# Supplementary material for: The Effect of Protozoa Indigenous to Lakewater and Wastewater on Decay of Fecal Indicator Bacteria and Coliphage
Source: MDPI journal article supplement (doi:10.3390/pathogens12030378), 2023-02-25
Supplement: s1 [file s1]

## Decay rate calculations

Cumulative decay rates for each indicator organism and treatment were calculated at various time points during the study as follows:  $(\log_{10} C_0 - \log_{10} C_T)/T_x$  where  $C_T$  represents concentration at different sampling time points ( $T_1, T_3, T_5, T_8, T_{14}$ ),  $C_0$  represents the starting concentrations measured at  $T_0$  and  $T_x$  represents the sampling time point in days ( $T_1=1; T_3=3; T_5=5; T_8=8; T_{14}=14$ ) (Table S1).

**Table S1.** Cumulative decay rate per day values for FIB and coliphage for each treatment and sampling day.

| Days     | <i>E. coli</i>         |                 |                 |                 | Enterococci     |                 |                 |                 | F+ coliphage    |                 |                 |                 | Somatic coliphage |                 |                 |                 |
|----------|------------------------|-----------------|-----------------|-----------------|-----------------|-----------------|-----------------|-----------------|-----------------|-----------------|-----------------|-----------------|-------------------|-----------------|-----------------|-----------------|
|          | Treatment <sup>1</sup> |                 |                 |                 |                 |                 |                 |                 |                 |                 |                 |                 |                   |                 |                 |                 |
|          | A                      | B               | C               | D               | A               | B               | C               | D               | A               | B               | C               | D               | A                 | B               | C               | D               |
| $T_1$    | $2.60 \pm 0.19$        | $2.39 \pm 0.16$ | $0.13 \pm 0.53$ | $0.87 \pm 0.27$ | $2.92 \pm 0.10$ | $3.10 \pm 0.22$ | $0.66 \pm 0.33$ | $0.39 \pm 0.26$ | $0.35 \pm 0.11$ | $0.34 \pm 0.15$ | $0.15 \pm 0.08$ | $0.35 \pm 0.14$ | $0.03 \pm 0.04$   | $0.02 \pm 0.06$ | $0.08 \pm 0.02$ | $0.17 \pm 0.02$ |
| $T_3$    | $0.99 \pm 0.03$        | $0.83 \pm 0.02$ | $0.37 \pm 0.17$ | $0.56 \pm 0.02$ | $1.11 \pm 0.03$ | $1.01 \pm 0.06$ | $0.40 \pm 0.08$ | $0.78 \pm 0.82$ | $0.47 \pm 0.01$ | $0.45 \pm 0.05$ | $0.47 \pm 0.02$ | $0.47 \pm 0.01$ | $0.30 \pm 0.02$   | $0.30 \pm 0.02$ | $0.23 \pm 0.01$ | $0.23 \pm 0.02$ |
| $T_5$    | $0.49 \pm 0.02$        | $0.42 \pm 0.02$ | $0.16 \pm 0.09$ | $0.27 \pm 0.01$ | $0.85 \pm 0.21$ | $0.58 \pm 0.17$ | $0.38 \pm 0.10$ | $0.24 \pm 0.11$ | $0.36 \pm 0.02$ | $0.32 \pm 0.13$ | $0.52 \pm 0.04$ | $0.27 \pm 0.03$ | $0.20 \pm 0.03$   | $0.23 \pm 0.01$ | $0.25 \pm 0.03$ | $0.28 \pm 0.01$ |
| $T_8$    | $0.37 \pm 0.09$        | $0.27 \pm 0.01$ | $0.16 \pm 0.03$ | $0.18 \pm 0.01$ | $0.73 \pm 0.01$ | $0.62 \pm 0.07$ | $0.61 \pm 0.04$ | $0.52 \pm 0.05$ | $0.31 \pm 0.03$ | $0.30 \pm 0.02$ | $0.34 \pm 0.00$ | $0.30 \pm 0.01$ | $0.20 \pm 0.04$   | $0.09 \pm 0.02$ | $0.26 \pm 0.03$ | $0.12 \pm 0.01$ |
| $T_{14}$ | $0.42 \pm 0.01$        | $0.19 \pm 0.05$ | $0.25 \pm 0.01$ | $0.19 \pm 0.03$ | $0.39 \pm 0.01$ | $0.25 \pm 0.06$ | $0.31 \pm 0.08$ | $0.21 \pm 0.01$ | $0.21 \pm 0.00$ | $0.20 \pm 0.00$ | $0.20 \pm 0.00$ | $0.21 \pm 0.00$ | $0.18 \pm 0.00$   | $0.09 \pm 0.04$ | $0.20 \pm 0.00$ | $0.09 \pm 0.02$ |

<sup>1</sup>A (lake protozoa/sun), B (lake protozoa/shade), C (wastewater protozoa/sun), D (wastewater protozoa/shade)

## Left-censored data

The frequency of left-censored observations (below assay limit of detection, also known as non-detects) was low - 1.38%-12.5% per assay out of 72 samples collected in the study (4 treatments x 3 replicates x 6 sampling time points and it mostly occurred at later time points (Table S2). The limit of detection (LOD) was substituted for left-censored observations and used to calculate  $\log_{10}$  reduction and decay rate values. The LOD was 100 PFU per 100 mL for coliphages, and it varied between 1 and 10 CFU per 100 mL for enterococci, based on the volume of the sample processed. *E. coli* was always detected for all of the replicates for the duration of the study.

**Table S2.** Analyses with observations below assay limit of detection

| Time point      | Treatment | Indicator         | Number of non-detects* |
|-----------------|-----------|-------------------|------------------------|
| T <sub>5</sub>  | A         | Enterococci       | 2/3                    |
| T <sub>8</sub>  | A         |                   | 3/3                    |
|                 | C         |                   | 2/3                    |
| T <sub>14</sub> | A         |                   | 1/3                    |
|                 | B         |                   | 1/3                    |
| T <sub>5</sub>  | C         | F+ coliphage      | 2/3                    |
| T <sub>8</sub>  | C         |                   | 2/3                    |
| T <sub>14</sub> | A         |                   | 1/3                    |
|                 | C         |                   | 2/3                    |
|                 | D         |                   | 1/3                    |
| T <sub>14</sub> | C         | Somatic coliphage | 1/3                    |

\*Out of three independent replicates.
